# Supplementary material for: Research on the signaling pathway and the related mechanism of traditional Chinese medicine intervention in chronic gastritis of the “inflammation-cancer transformation”
Source: Front Pharmacol. 2024 Apr 18;15:1338471. doi: 10.3389/fphar.2024.1338471 (PMC11063381; doi:10.3389/fphar.2024.1338471)
Supplement: Supplementary file 1 [file Table2.xlsx]

## Sheet: Supplementary Table 2
Table S2 Mechanism of action of traditional Chinese medicine monomers in the treatment of chronic gastritis "inflammation-cancer" transformation
Refrence	Active ingredients	Herb	In-Vivo model	In-Vitro model	Molecular mechanisms and outcomes	effect	Signal pathways
CNAG-CAG
Shi et al (2021)	total triterpenoids from Chaenomeles speciosa	Mugau ，Chaenomele，Sinensis (Thouin)，Koehne	CAG mice infected by Hp		↓ROS,MCP-1,KC,TNF-α,IL-1β, IL-6,IL-18,MDA,MPO,LDH, TLR4,MyD88,Bax,Bad，↑IL-4,IL-10,SOD,CAT,GSH-Px	enhance the function of endogenous antioxidant system, suppress the oxidative stress and inflammatory reaction induced by Hp, correct lysosomal dysfunction and inflammatory activation	TLR4/NF-κB/ NLRP3
Ma et al (2021)	acetate extractions	Gaoliangjiang，Alpiniae Officinarum Rhizome		GES-1 cells infected by Hp	↓IKKβ，p-IKKα/β，p-NF-κB p65，p-IκBα，IL-8	Improve the inflammation caused by H.pylori	NF-κB
Qin S et al (2017)	Astragaloside IV	Huangqi Hedysarum Multijugum Maxim.	ethanol-induced gastric mucosal injury in rats		↓MPO，TNF-α，NF-κB p65，TRAF2，↑IL-10	have a protective effect against ethanol-induced mucosal injury	TNF-α/NF-κB
Huang X et al (2013)	diterpenoid C	Jianghuang Curcumaelongae Rhizoma		GES-1 cells infected by Hp	↓IL-8，IKK，IKK γ，p65↑IL-4	reduce the secretion of H. pylori-induced proinflammatory cytokine and increase the secretion of anti-inflammatory cytokine.	NF-κB
Ji W et al (2019)	Baicalin	Huangqin Scutellariae Radix	CG rats model was established by ethanol		↓TNF-α，IL-8，IL-1β，NO，ET-1，PGE2，LDH，COX-2，Akt，p-Akt，IκBα，p-IκBα，NF-κBp65，NF-κBp-p65	suppress the levels of inflammatory regulators	AKt/NF-κB
Yu L et al (2020)	Wheat Peptides	Maiya Hordei Fructus Germinatus	ethanol-induced acute gastric mucosal injury in rats		↓iNOS，TNF-α，IL-1β，IL-6，TFF1，p-NF-κB p65	improve the gastric microcirculation and inhibit inflammation	NF-κB
Hossen MJ et al (2019)	an ethanolic extract	Cangzhu，Atractylodes Lancea (Thunb.)Dc.	CG rats model was established by HCl/EtOH	（LPS)-stimulated RAW 264.7 macrophage model	↓NO，PGE2,iNOS，COX-2， NF-κB（p50）	an anti-gastritis effect	Akt/NF-κB
Ren Q et al (2018)	Astragalus polysaccharide	Huangqi Hedysarum Multijugum Maxim.	CAG rats model was established by N-methyl-N'-nitro-N-nitrosoguanidine(MNNG)		↓p-IKKα/β，p-NF-κB p65	mitigate inflammation and gastric mucosal damage	NF-κB
Cai et al (2021)	Matrine	Kushen （Sophorae Flavescentis Radix）	CAG rats model was established by N-methyl-N'-nitro-N-nitrosoguanidine(MNNG),ranitidine dosing, ethanol load and dietary irregularity		↓IL-1β,IL-6,TNF-α，TLR4，MyD88 ，NF-κB	Regulate the homeostasis of inflammatory microenvironment of gastric mucosa of CAG model rats to play a role in protecting gastric mucosa	TLR4／MyD88 ／NF-κB
Jiang et al (2019)	Touhualiao	Polygonum （Capitatum Buch.-Ham. ex D. Don）		GES-1 cell infected with H.pylori	↓TLR2，TLR4，TLR5， TLR9，MyD88，TRAF6	Improve the inflammation caused by H.pylori	TLR
Zhao et al (2017)	astragaloside Ⅳ	Huangqi Hedysarum Multijugum Maxim.	CAG rats model was induced by implantation of a spring into the pylorus in combination with intragastric administration of hot salty starch paste		↑Ptch Cyclin D1 ↓SUFU	improve the gastric mucosal lesion	Hedgehog
Zhao et al (2017)	ginsenoside Rg1	Sanqi Panax Notoginseng (Burk.) F. H. Chen Ex C. Chow	CAG rats model was induced by implantation of a spring into the pylorus in combination with intragastric administration of hot salty starch paste		↑Shh Ptch Gil-1 ↓SUFU	improve the gastric mucosal lesion	Hedgehog
Liu et al (2022)	patchouli alcohol	Guanghuoxiang Pogostemon Cablin (Blanco) Benth.	CG rats was prepared by a combination of MNNG inducement and Helicobacter pylori infection		↓IL-8,TNF-α,Wnt2, β-catenin,NF-κB	improve gastric mucosa injuries caused by inflammatory reaction and prevent EMT	Wnt/β- catenin
LI et al (2015)	astragalosideⅣ	Huangqi Hedysarum Multijugum Maxim.	CAG rats model was established by sodium deoxycholate，ammonia and ethanol		↓NO，iNOS ↑SOD	reduce or block lipid peroxidation, protect gastric mucosa
Shen T et al (2013)	Andrographolide	Chuanxinlian Andrographis Herba		lipopolysaccharide- (LPS-) activated RAW264.7 cells	↓NO，PGE2，iNOS，TNF-β，COX-2,IFN-β，ERK/AP-1，IKK ε,IRF-3	anti-inflammatory effect	ERK
Yang T et al (2021)	Berberine（BBR）	Huanglian Coptidis Rhizoma	CAG mice infected by Hp	Hp were applied to induce M1 Mφs polarization, IL-4 and BBR were used to induce M2 Mφs polarization	↓TNF-α，NOS2，CCR7，IRF-8↑IL-4，STAT6，IL-10，Chil3	effect in M2 Mφs activation and anti-inflammatory	IL-4-STAT6
Zhang J et al (2022)	I. compacta extract	Incarvillea compacta Maxim	Acute gastritis mice model was established by HCl and ethanol	Lipopolysaccharide (LPS)-induced RAW 264.7 macrophage	↓NO,IL-6,MCP-1,TNF-α,PDK1,AKT, GSK3β,NLRP3,iNOS,IL-1β	reduce inflammatory lesions	PI3K/AKT
Manikandan P et al (2010)	Eugenol	Dingxiang Caryophylliflos	CAG rats model was established by N-methyl-N'-nitro-N-nitrosoguanidine(MNNG)		↓Bcl-2 family proteins, Apaf-1, cytochrome C, and caspases， MMPs , VEGF, VEGFR1, TIMP-2 ，RECK	inhibite invasion, and angiogenesis	Bcl-2/APAF-1 /VEGF
Chang Y et al (2021)	Gentiopicroside	Longdan Gentianae Radix Et Rhozima	CAG mice model was established by ethanol load	human gastric mucosal GES cells were treated by ethanol	↓pERK1/2 ，MMP-10，TNF-β, IL-1β, IL-8，↑IL-10	anti-inflammation	MMP-10， pERK1/2
Chen X et al (2020)	Palmatine	Huanglian Coptidis Rhizoma	CAG mice infected by Hp	GES-1 cells infected by Hp	↓disintegrin，ADAM17，HB-EGF，CXCL-16，IL-8	alleviate the histological damage of gastric mucosa and the morphological changes of gastric epithelial cell	ADAM10 / EGFR
Niu et al (2021)	Baicalin	Huangqin Scutellariae Radix	CAG rats model was established by ranitidine dosing		↑OPG，RANKL，NO，SOD	Reduce the histological damage of gastric mucosa	OPG/RANKL
CAG-IM/Dys
Dong et al (2020)	astragalus polysaccharides	Huangqi Hedysarum Multijugum Maxim.	CAG rats model was established by N-methyl-N'-nitro-N-nitrosoguanidine(MNNG),ranitidine dosing, ethanol load and dietary irregularity		↓GAS,IL-6,TNF-α,JAK1,STAT3	regulate the release of gastrointestinal hormones,inhibit the release of inflammatory factors	JAK1/STAT3
GC
Ma X et al (2022)	Curcumol	Jianghuang Curcumaelongae Rhizoma	gastric cancer cells		↓SDF-1α, CXCR4, NF-κB, p-NF-κB	inhibits the viability of gastric cancer cells	SDF-1α/CXCR4 /NF-κb
Wang XH et al (2016)	wogonin	Huangqi Hedysarum Multijugum Maxim.		gastric cancer cell lines( SGC7901,BGC-823 and MKN-45)	↓β-catenin,C-myc, Cyclin D1	induce apoptosis and inhibit cell migration and invasion	Wnt/β- catenin
Yang JY et al (2021)	Evodiamine	Wuzhuyu Evodiae Fructus		AGS cells were infected with H. pylori	↓IL-8，CagA，VacA，T4SS，ERK1/2，p38，JNK，p65（NF-κB）	anti-bacterial and anti-inflammatory effects	NF-κB， MAPK
Qian et al (2021)	evodiamine	Wuzhuyu Evodiae Fructus	Human gastric cancer cells		↓SGC-7901，MAPK，p-ERK↑Bcl-2、cleaved-caspase-3，p-p38	Anti-tumor	MAPK
