# Supplementary material for: Research on the signaling pathway and the related mechanism of traditional Chinese medicine intervention in chronic gastritis of the “inflammation-cancer transformation”
Source: Front Pharmacol. 2024 Apr 18;15:1338471. doi: 10.3389/fphar.2024.1338471 (PMC11063381; doi:10.3389/fphar.2024.1338471)
Supplement: Supplementary file 2 [file Table1.xlsx]

## Sheet: Supplementary Table 1
Table S1 Mechanisms of "inflammation-cancer" transformation in chronic gastritis treated with Chinese herbal medicine combinations
Reference	Herbal formula	Ingredients	In-Vivo model	In-Vitro model	Molecular mechanisms and outcomes	effect	Signal pathways
CNAG-CAG
Li et al (2019)	XieFuNing granule	unknown	CNAG rat model was established by ammonia and dietary irregularity		↓NF-κB，NO，MDA，TNF-α， IL-６，IL-８	Protect the gastric mucosa in CNAG	NF⁃κB，TNF-a
Lin et al (2021)	Jianpi Qinghua Sanyu Decoction	Dangshen，Codonopsis Radix，Sharen，Amomum Aurantiacum H. T. Tsai Et S. W. Zhao，Baizhu，Atractylodes Macrocephala Koidz.，Fuling，Poria Cocos(Schw.) Wolf.，Banxia，Arum Ternatum Thunb.，Baibiandou，Lablab Semen Album，Chenpi，Citrus Reticulata，Yinchen，Artemisiae Scopariae Herba，Huanglian，Coptidis Rhizoma，Houpu，Magnolia Officinalis Rehd Et Wils．，Ezhu，Curcumae Rhizoma，Danshen，Radix Salviae，Gancao，licorice	CAG rats model was established by ammonia，sodium deoxycholate and ethanol gavage		↓TXNDC5、NOX2、 NF-κB、TNF-α	improve the pathological changes of gastric mucosa in CAG ratss	NF-κB、Wnt/β-catenin、 NOX2
Pan et al (2019)	WeiSu granule	Zisu，Perilla Frutescens，Xiangfu，Cyperi Rhizoma，Xiangfu Cyperi Rhizoma，Xiangyuan，Citri Fructus，Foshou Citri Sarcodactylis Fructus，Zhike，Aurantii Fructus Binglang，Arecae Semen	CAG patients		↓NF-κB ↑TFF2	improve the pathological changes of gastric mucosa in CAG patients	NF-κB，TFF2
Yi et al (2022)	ChaiShao LiuJun Decoction	Renshen，Panax Ginseng C. A. Mey.，Dangshen，Codonopsis Radix Chaihu，Radix Bupleuri，Chuanxiong，Chuanxiong Rhizoma，Sharen Amomum Aurantiacum H. T. Tsai Et S. W. Zhao，Zhishi Aurantii Fructus Immaturus，Baishao，Paeoniae Radix Alba Fuling，Poria Cocos(Schw.) Wolf.，Baizhu，Atractylodes Macrocephala Koidz. Banxia，Arum Ternatum Thunb.，Chenpi，Citrus Reticulata，Gancao，licorice	CAG rats model was established by ammonia and sodium deoxycholate		↓NF-κB	improve the pathological changes of gastric mucosa in CAG ratss	NF-κB
Hu et al (2022)	Weian Chuyou Decoction	Huanglian，Coptidis Rhizoma，Huangqin，Scutellariae Radix，Ganjiang Zingiberis Rhizoma，Shengjiang，Zingiber Officinale Roscoe，Dangshen Codonopsis Radix，Gancao，licorice，Dazao，Jujubae Fructus	CG patients of HP positive		↓MyD88，I-RAK，NF-κB	improve immune function and alleviate the imbalance of intestinal flora	MyD88/I-RAK /NF-κB
You et al (2023)	Weiwei Tongtiao decoction	Taizishen，Pseudostellariae Radix，Yuzhizi，Akebiae Frucyus，Danshen Radix Salviae，Tanxiang，Santalum Album L．，Sharen Amomum Aurantiacum H. T. Tsai Et S. W. Zhao，Fuling，Poria Cocos(Schw.) Wolf.，Baizhu，Atractylodes Macrocephala Koidz.，Yiyiren，Coicis Semen Baishao，Paeoniae Radix Alba，Mugau，Chaenomeles Sinensis (Thouin) Koehne Gancao，licorice	CAG rats model was established by N-methyl-N'-nitro-N-nitrosoguanidine(MNNG) and ranitidine dosing		↓COX-2,NF-κB p65,IL-1α,IL-1β,IL-10 ,IL-8α,IL-8β	improve the pathological changes of gastric mucosa in CAG ratss	NF-κB
Shi Z et al (2018)	Jinghua Weikang capsule	Li Chenopodium ambrosioides L. Qiancao Rubiaceae adina pilulifera	CAG mice infected by Hp		↓NF-κB,pNF-κBNF-κB p65,IL-1α	a protective effect against gastric injury via inhibition of inflammation reactions	NF-κB
Zhang et al (2020)	Wenweishu Capsule	Dangshen，Codonopsis Radix，Fuzi，Aconiti Lateralis Radix Praeparata Huangqi，Hedysarum Multijugum Maxim.，Rougui，Cinnanmomi Cortex Shanyao，Rhizoma Dioscoreae，Baizhu，Atractylodes Macrocephala Koidz. Roucongrong，Cistanches Herba，Shanzha，Crataegi Folium，Wumei Mume Fructus，Sharen，Amomum Aurantiacum H. T. Tsai Et S. W. Zhao	CAG rats model was established by sodium deoxycholate，ammonia，ethanol and dietary irregularity		↓TNF-α，IL-6，NF-κB p65，IκBα，COX2	anti-inflammatory effect	NF-κB
Lin et al (2016)	Xiangsha Liujunzi Decoction	Renshen，Panax Ginseng C. A. Mey，Baizhu，Atractylodes Macrocephala Koidz. Fuling，Poria Cocos(Schw.) Wolf.，Gancao，licorice，Chenpi，Citrus Reticulata Banxia，Arum Ternatum Thunb.，Muxiang，Aucklandiae Radix，Sharen Amomum Aurantiacum H. T. Tsai Et S. W. Zhao	CAG rats model induced by H.pylori		↓TLR2，TLR4，p-P38，MAPK，NF-κB， TNF-α，IL-6，iNOS，NO	eradicate H. pylori and alleviate chronic atrophic gastric mucosal inflammation	TLR/MAPK/NF-Κb /iNOS/NO
Zhao et al (2017)	Unknown	Huangqi Hedysarum Multijugum Maxim. Sanqi Panax Notoginseng (Burk.) F. H. Chen Ex C. Chow	CAG model was established by implantation of a pyloric spring and intragastic administration of hot starch paste with high-salt		↓PCNA fas-L ↑TGF-β	protect the gastric mucosal	Hedgehog
Li et al (2021)	spleen-fortifying, fire-clearing and collateral-unblocking(SFC) medicinals	Huangqi，Hedysarum Multijugum Maxim.，Dangshen，Codonopsis Radix， Baizhu，Atractylodes Macrocephala Koidz.，Fuling，Poria Cocos(Schw.) Wolf.，Banxia，Arum Ternatum Thunb.，Sharen，Amomum Aurantiacum H. T. Tsai Et S. W. Zhao，Peilan，Eupatorium Fortunei Turcz，Huanglian，Coptidis Rhizoma，Chenpi，Citrus Reticulata，Ezhu，Curcumae Rhizoma，Gancao，licorice	CAG rats model was established by N-methyl-N'-nitro-N-nitrosoguanidine(MNNG), ranitidine dosing,ethanol load and dietary irregularity		↑Shh，Ptch1，Smo，Gli1 ↓Gli2，Gli3，Sufu，IL-1β	improve the pathological changes of CAG	Hedgehog
He et al (2021)	Huanglian Wendan Decoction	Chenpi，Citrus Reticulata，Banxia，Arum Ternatum Thunb.，Fuling Poria Cocos(Schw.) Wolf.，Gancao，licorice，Huanglian，Coptidis Rhizoma Zhishi，Aurantii Fructus Immaturus，Dazao，Jujubae Fructus，Zhuru，Bomboo Juice	CAG patients associated with Hp		↓IL-17，IL-10，Smad3 TGF-β1	improve the clinical symptoms, promote recovery and reduce inflammatory reaction	TGF-β1/Smad
Tong Y et al (2021)	Zuojin Pill	Huanglian Coptidis Rhizoma Wuzhuyu Evodiae Fructus	CAG rats model was established by N-methyl-N'-nitro-N-nitrosoguanidine		↓G-17,IL-8,TNF-α,IL-6,IL-1β,TGF-β1,PI3K,p-Akt,p-mTOR,P70S6K,↑PTEN,LC3-II,Beclin-1	have a good therapeutic effect on CAG	TGF-β1/PI3K/Akt
Ma et al (2018)	Weifuchun	Hongshen Ginsen Radix Et Rhizoma Rubra Zhike Aurantii Fructus	CAG rats model was established by N-methyl-N'-nitro-N-nitrosoguanidine		↓RUNX3,smad2,p-smad3/4,TGF-β2, p21↑bim、foxo3	improve the pathological changes of CAG	RUNX3/TGF-β /Smad
Li et al (2019)	Weiwei Decoction	Dangshen，Codonopsis Radix，Danshen，Radix Salviae，Huangqi Hedysarum Multijugum Maxim.，Danggui，Angelicae Sinensis Radix，Sharen Amomum Aurantiacum H. T. Tsai Et S. W. Zhao，Zhike，Aurantii Fructus，Chenpi，Citrus Reticulata，Baiji，Bletilla Striata (Thunb.Ex A.Murray)Rchb.F.，Ezhu，Curcumae Rhizoma，Foshou，Citri Sarcodactylis Fructus，Huangqin，Scutellariae Radix，Gancao，licorice，Huanglian，Coptidis Rhizoma，Dazao…	CAG rats model was established by N-methyl-N'-nitro-N-nitrosoguanidine		↓MVD,GAS,PP,PGE2, SOD,GSK-3β↑MDA, β-catenin,COX-2	improve the pathological state of gastric mucosal atrophy,promote microvascular angiogenesis, inhibit gastric mucosal oxidative stress,improve gastric mucosal acidity	Wnt/β-catenin
Di et al (2023)	Shengyang Yiwei Decoction	Huangqi，Hedysarum Multijugum Maxim.，Banxia，Arum Ternatum Thunb.，Dangshen，Codonopsis Radix，Gancao，licorice，Duhuo，Radix Angelicae Biseratae，Fangfeng，Saposhnikoviae Radix，Baishao，Paeoniae Radix Alba，Qianghuo，Notopterygii Rhizoma Et Radix，Chenpi，Citrus Reticulata，Fuling，Poria Cocos(Schw.) Wolf.，Chaihu，Radix Bupleuri，Zexie，Alisma Orientale (Sam.) Juz.，Baizhu，Atractylodes Macrocephala Koidz.，Huanglian，…	CAG rats model was established by sodium deoxycholate		↓Wnt2,β-catenin	reduce the pathological injury of gastric tissue	Wnt/β-catenin
Yan Z et al (2021)	Jianpiyiqi formula	Dangshen，Codonopsis Radix，Fuling，Poria Cocos(Schw.) Wolf.，Baizhu Atractylodes Macrocephala Koidz.，Fuling，Poria Cocos(Schw.) Wolf.，Gancao licorice，Chenpi，Citrus Reticulata，Banxia，Arum Ternatum Thunb.，Muxiang Aucklandiae Radix，Sharen，Amomum Aurantiacum H. T. Tsai Et S. W. Zhao Ezhu，Curcumae Rhizoma，Baihuasheshecao，Hedyotis Diffusae Herba Yujin，Curcumae Radix	CAG rats model was established by N-methyl-N'-nitro-N-nitrosoguanidine(MNNG) and ranitidine dosing		↓Wnt1,Wnt5a,β-catenin, cyclin D1,MMP7 ↑GSK-3β	ameliorate gastric gland atrophy and gastric mucosal inflammation	Wnt/β-catenin
Liu et al (2022)	modified Shashen Maidong Decoction	Beishashen，Glehniae Radix，Yuzhu，Polygonati Odorati Rhizoma，Baibiandou Lablab Semen Album，Tianhuafen，Trichosanthis Radix，Sangye Mori Follum，Gancao，licorice，Baishao，Paeoniae Radix Alba，Mugau Chaenomeles Sinensis (Thouin) Koehne	CAG rats model was established by N-methyl-N'-nitro-N-nitrosoguanidine(MNNG）		↑GAS、SS↓MTL，ERF， EGFR，p-ERK1/2	increase the blood flow of gastric mucosa,regulate the secretion of gastrointestinal hormones，improve the gastric mucosal lesions	EGFR/MAPK
Ma et al (2022)	Zuojin Pill	Huanglian Coptidis Rhizoma Wuzhuyu Evodiae Fructus	CNAG patients		↓COX-2, IL-4, IL-17	acts as an inflammatory suppressor to regulate comprehensive metabolism disorders	COX-2，IL-4， IL-17
Cao et al (2017)	XiaoJianZhong Decoction	Guizhi，Cinnamomi Ramulus，Baishao，Paeoniae Radix Alba，Gancao licorice，Shengjiang，Zingiber Officinale Roscoe，Dazao，Jujubae Fructus Yitang，Hordei Fructus Germinatus	CNAG rat model was established by irregular eating，chemical stimulation， eating raw and cold food		↓IL-23，IL-17，CCR6， CCL20	anti-inflammatory effect	IL-23/IL-17
Wei et al (2018)	Anwei Decoction	Banxia，Arum Ternatum Thunb.，Huanglian，Coptidis Rhizoma，Ganjiang Zingiberis Rhizoma，Baihe，Lilii Bulbus，Baishao，Paeoniae Radix Alba Yiyiren，Coicis Semen，Wuyao，Linderae Radix，Danshen，Radix Salviae Gancao，licorice	CAG rats model was established by N-methyl-N'-nitro-N-nitrosoguanidine(MNNG)		↑PTEN↓PI3K，Akt， PDK1，XIAP	improve pathological changes of gastric mucosa of CAG ratss ， have an obvious anti-CAG effect，promote apoptosis of gastric- mucosal cells	PI3K/Akt
Yan et al (2019)	Jianpi Yiqi Formula	Dangshen，Codonopsis Radix，Fuling，Poria Cocos(Schw.) Wolf.，Baizhu Atractylodes Macrocephala Koidz.，Fuling，Poria Cocos(Schw.) Wolf.，Gancao licorice，Chenpi，Citrus Reticulata，Banxia，Arum Ternatum Thunb.，Muxiang Aucklandiae Radix，Sharen，Amomum Aurantiacum H. T. Tsai Et S. W. Zhao，Ezhu Curcumae Rhizoma，Baihuasheshecao，Hedyotis Diffusae Herba，Yujin，Curcumae Radix	CAG rats model was established by N-methyl-N'-nitro-N-nitrosoguanidine(MNNG)		↑GAS，PGE2↓PI3K，Akt	promote apoptosis of gastric mucosal cells	PI3K/Akt
Duan et al (2020)	Xiangsha Liujunzi Decoction	Renshen，Panax Ginseng C. A. Mey，Baizhu，Atractylodes Macrocephala Koidz.，Fuling Poria Cocos(Schw.) Wolf.，Gancao，licorice，Chenpi，Citrus Reticulata，Banxia Arum Ternatum Thunb.，Muxiang，Aucklandiae Radix，Sharen Amomum Aurantiacum H. T. Tsai Et S. W. Zhao	CAG rats model was established by N-methyl-N'-nitro-N-nitrosoguanidine(MNNG) and dietary irregularity		↑PTEN，↓PI3K，Akt ，VEGF	improve the pathological state of gastric mucosal atrophy	PI3K/Akt
Zeng et al (2020)	Mieyou Decoction	Huangqin，Scutellariae Radix，Sanqi，Panax Notoginseng (Burk.) F. H. Chen Ex C. Chow Baiji，Bletilla Striata (Thunb.Ex A.Murray)Rchb.F.，Qingpi，Citri Reticulatae Pericarpium Viride Chenpi，Citrus Reticulata et al.	CAG mice infected by Hp		↑PTEN，FoxO3a，↓PI3K p -Akt	prevent Helicobacter pylori-induced gastric mucosal cell apoptosis	PI3K/Akt
Tian et al (2021)	compound gastritis mixture	Huangqi，Hedysarum Multijugum Maxim.，Dangshen，Codonopsis Radix，Baizhu，Atractylodes Macrocephala Koidz.，Zhike，Aurantii Fructus，Fuling，Poria Cocos(Schw.) Wolf.，Banxia，Arum Ternatum Thunb.，Baishao，Paeoniae Radix Alba，Sharen，Amomum Aurantiacum H. T. Tsai Et S. W. Zhao，Peilan，Eupatorium Fortunei Turcz，Huanglian，Coptidis Rhizoma，Chenpi，Citrus Reticulata，Ezhu，Curcumae Rhizoma，Gancao，licorice	CAG ratss with spleen deficiency and damp-heat syndrome was established by using the method of "hunger and satiety disorder+wet environment+high fat and high sugar diet"		↓JAK1, STAT3, TNF-α, IL-6, IL-8 ↑IL-10	inhibit the progress of CAG	JAK1/STAT3
Tang et al (2022)	Xiangren Weishu decoction	Muxiang，Aucklandiae Radix，Sharen，Amomum Aurantiacum H. T. Tsai Et S. W. Zhao，Zhike，Aurantii Fructus，Houpu，Magnolia Officinalis Rehd Et Wils．	CNAG rat model was established by chemical stimulation combined with hunger and satiety disorder		↓P-JAK2,JAK2,STAT3, IL-8,IL-1β	repair gastric mucosal injury in CNAG rats	JAK2/STAT3
Chen et al (2022)	Gualou Xiebai Banxia Decoction	Xiebai，Allium Azureum Ledeb.，Banxia，Arum Ternatum Thunb.，Gualou Trichosanthes Kirilowii Maxim，Danggui，Angelicae Sinensis Radix，Chuanxiong，Chuanxiong Rhizoma，Fuling，Poria Cocos(Schw.) Wolf.，Danshen，Radix Salviae，Taizishen，Pseudostellariae Radix，Guizhi，Cinnamomi Ramulus，Tanxiang，Santalum Album L，Sharen，Amomum Aurantiacum H. T. Tsai Et S. W. Zhao	CAG patients		↓JAK2,STAT3	optimize the short-term efficacy on CAG	JAK2/STAT3
Sun et al (2020)	XieFuNing granule	unknown	CNAG rat model was established by ammonia and dietary irregularity		↓JAK2,P-JAK2,STAT3, IL-6	Protect the gastric mucosa in CNAG	JAK2/STAT3
CAG-IM/Dys
Hua et al (2019)	ShiDan granule	Dangshen， Codonopsis Radix，Huangqi，Hedysarum Multijugum Maxim.，Baizhu，Atractylodes Macrocephala Koidz.，Fuling，Poria Cocos(Schw.) Wolf.，Muxiang，Aucklandiae Radix，Zisu，Perilla Frutescens，Shanzhaye Crataegi Folium and other 5 Chinese medcine	CAG rats model was established by N-methyl-N'-nitro-N-nitrosoguanidine(MNNG), ranitidine dosing and Ammonia		↓NF-κB，p65，IKKβ	Repaire the gastric mucosa	NF-κB
Zheng et al (2022)	modified Danggui Shaoyao Powder	Danggui，Angelicae Sinensis Radix，Chishao，Radix Paeoniae Rubra，Fuling Poria Cocos(Schw.) Wolf.，Baizhu，Atractylodes Macrocephala Koidz.，Zexie Alisma Orientale (Sam.) Juz.，Chuanxiong，Chuanxiong Rhizoma，Chaihu Radix Bupleuri，Huangqin，Scutellariae Radix，Ezhu，Curcumae Rhizoma	CAG rats model induced by N-methyl-N-nitro-N-nitrosoguanidine(MNNG)		↑SOCS3，Bcl-2 ↓TLR4、p-JAK2、p-STAT3，NF-κB，MyD88，NLRP3，Bax，Bad，IL-6、 TNF-α，CRP	Reduce apoptosis and improve gastric mucosal atrophy, intestinal epithelial metaplasia and inflammatory cell infiltration	SOCS3/TLR4
Li S et al (2018)	Qinghuayin	Baibiandou，Lablab Semen Album，Fuling，Poria Cocos(Schw.) Wolf.，Yiyiren Coicis Semen，Yinchen，Artemisiae Scopariae Herba，Peilan Eupatorium Fortunei Turcz，Doukou，Alpinia Katsumadai Hayat Houpu，Magnolia Officinalis Rehd Et Wils．，Chishao，Radix Paeoniae Rubra	CAG rats model was established by sodium deoxycholate and ethanol		↓IL-6,IL-8，TLR4，TRIF	downregulate of the enhanced inflammatory signaling pathways	TLR4/TRIF
Zhao et al (2017)	invigorating qi and activating blood therap	Huangqi Hedysarum Multijugum Maxim. Sanqi Panax Notoginseng (Burk.) F. H. Chen Ex C. Chow	CAG rats model was established by N-methyl-N'-nitro-N-nitrosoguanidine(MNNG), ranitidine dosing,ethanol load and dietary irregularity		↑GAS Shh Ptch Smo	improve the gastric mucosal lesion	Hedgehog
Chen et al (2018)	WeiweiKang	Xiyangshen，Panacis Quinquefolii Radix，Baizhu，Atractylodes Macrocephala Koidz.，Baishao，Paeoniae Radix Alba，Sanqi，Panax Notoginseng (Burk.) F. H. Chen Ex C. Chow，Yanhusuo，Corydalis Rhizoma	CAG rats model was established by sodium deoxycholate		↓Gli1，Gli2，Gli3	improve the pathological changes of CAG	Hedgehog
Han L et al (2023)	Weierning tablet	Dangshen，Codonopsis Radix，Tianhuafen，Trichosanthis Radix，Houpu Magnolia Officinalis Rehd Et Wils．，Muxiang，Aucklandiae Radix，Banxia Arum Ternatum Thunb.，Maqianzi，Strychni Semen	CAG rats model was established by sodium deoxycholate and ethanol		↓IL-1β，IL-6，IL-8，IL-10，TNF-α，IFN-γ， Cdx2，Muc2，Shh，Gli1，Smo	improve CAG and reverse intestinal metaplasia	Hedgehog
Lin et al (2022)	Yiguanjian Decoction	Shudihuang，Rehmanniae Radix Praeparata，Beishashen，Glehniae Radix Danggui，Angelicae Sinensis Radix，Gouqizi，Lycii Fructus，Chuanlianzi Toosendan Fructus	CAG rats model was established by N-methyl-N'-nitro-N-nitrosoguanidine(MNNG), ethanol load and dietary irregularity		↓T3，T4，TSH，TGF-β1 ↑Smad3，Smad4	improve gastric mucosal lesions and regulate thyroid function	TGF-β1/Smad
Li S et al (2021)	Banxia Xiexin decoction	Banxia，Arum Ternatum Thunb.，Huangqin，Scutellariae Radix，Ganjiang Zingiberis Rhizoma，Renshen，Panax Ginseng C. A. Mey.，Huanglian Coptidis Rhizoma，Dazao，Jujubae Fructus，Gancao，licorice	CAG patients		↓Smad1，Smad2，TGF-β1	improve the clinical symptoms of patients with CAG	TGF-β1/Smad
Yang et al (2016)	Shuangpu Decoction	Puhuang，Pollen Typhae，Taizishen，Pseudostellariae Radix，Baihuasheshecao Hedyotis Diffusae Herba，Shijianchuan，Salviae Chinensis Herba et al.	CAG rats model was established by N-methyl-N'-nitro-N-nitrosoguanidine		↓Bcl-2,P53,PCNA,Ag-NORs,EGF, TGF-β1,↑Smad3	Regulate the imbalance between proliferation and apoptosis of gastric mucosal cells	TGF-β1/Smad3
Song et al (2020)	Weiweikang	Xiyangshen，Panacis Quinquefolii Radix，Baizhu，Atractylodes Macrocephala Koidz.，Baishao，Paeoniae Radix Alba，Yanhusuo，Corydalis Rhizoma，Sanqi Panax Notoginseng (Burk.) F. H. Chen Ex C. Chow，Gancao，licorice	CAG rats model was established by sodium deoxycholate		↓Akt,Mdm2 ↑P53	have the effect of treating CAG	Akt-Mdm2-P53
Liu et al (2023)	modified Danggui Shaoyao Powder	Danggui，Angelicae Sinensis Radix Paeoniae Rubra，Fuling，Poria Cocos(Schw.) Wolf.，Baizhu，Atractylodes Macrocephala Koidz.，Zexie，Alisma Orientale (Sam.) Juz.，Chuanxiong，Chuanxiong Rhizoma，Chaihu，Radix Bupleuri，Chenpi，Citrus Reticulata，Baishao，Paeoniae Radix Alba，Xiangfu，Cyperi Rhizoma，Zhike，Aurantii Fructus，Gancao，licorice	CAG rats model was established by N-methyl-N'-nitro-N-nitrosoguanidine and sodium deoxycholate		↓IL-6,JAK2、STAT3、p-STAT3、 cMYCI,↑IL-10	improve the degree of atrophy of gastric mucosa	JAK2/STAT3
Xiang et al (2022)	Coptidis Rhizoma and Pinelliae Rhizoma	Banxia Arum Ternatum Thunb. Huanglian Coptidis Rhizoma	CAG rats model was established by N-methyl-N'-nitro-N-nitrosoguanidine(MNNG), ranitidine dosing and ethanol load		↓IL-6,IL-1β,JAK2,STAT3, AKT1,YAP1,VEGF, EGFR↑p-YAP1	restore the morphology of gastric mucosa and prevent the evolution of malignant tumors	JAK2/STAT3
Li et al (2021)	modified Gualou Xiebai Banxia Decoction	Xiebai，Allium Azureum Ledeb.，Banxia，Arum Ternatum Thunb.，Gualou Trichosanthes Kirilowii Maxim，Huanglian，Coptidis Rhizoma，Zhike Aurantii Fructus，Yanhusuo，Corydalis Rhizoma	CAG rats model was established by N-methyl-N'-nitro-N-nitrosoguanidine(MNNG)		↓G-17,JAK2、STAT3,Hh	inhibit the inflammatory activity	JAK2/STAT3
Sun et al (2020)	Zhitong shunqi capsule	Guanghuoxiang，Pogostemon Cablin (Blanco) Benth.，Peilan，Eupatorium Fortunei Turcz，Chenpi，Citrus Reticulata，Dingxiang，Caryophylliflos，Dafupi，Areca Catechu L.，Shanyao，Rhizoma Dioscoreae，Rougui，Cinnanmomi Cortex，Gancao，licorice，Huangbo。Phellodendri Chinrnsis Cortex	CAG rats model was established by N-methyl-N'-nitro-N-nitrosoguanidine(MNNG) and dietary irregularity		↓IL-1β,IL-6,JAK1,STAT3, c-Myc↑SOCS-3	promote apoptosis of gastric mucosal cells	JAK/STAT
Hao et al (2021)	Huazhuo Jiedu Prescription	Yinchen，Artemisiae Scopariae Herba，Huangqin，Scutellariae Radix Huanglian，Coptidis Rhizoma，Guanghuoxiang，Pogostemon Cablin (Blanco) Benth.，Peilan，Eupatorium Fortunei Turcz，Baihuasheshecao，Hedyotis Diffusae Herba，Banzhilian，Scutellariae Barbatae Herba，Banbianlian，Lobeliae Chinensis Herba，Banlangen，Isatidis Radix，Kushen，Sophorae Flavescentis Radix，Jiaoguolan，Gynostemmae Pentaphylli Herba	CAG rats model was established by N-methyl-N'-nitro-N-nitrosoguanidine(MNNG) and ranitidine dosing		↑RASSF1A,SAV1,MST2m	have the effects of intervening CAG and delaying the progression of cancer	Hippo
Wang et al (2021)	Hewei Fanliu Kang	Chaihu，Radix Bupleuri，Baishao，Paeoniae Radix Alba，Zhike Aurantii Fructus，Xiangfu，Cyperi Rhizoma，Baizhu Atractylodes Macrocephala Koidz.，Huanglian，Coptidis Rhizoma Banxia，Arum Ternatum Thunb.，Gancao，licorice	Bile reflux gastritis rat model was established by gavage of the prepared reflux liquid		↓p38MAPK,COX-2	prevent the occurrence of intestinal metaplasia,atypical hyperplasia and other precancerous lesions	MAPK
Liu et al (2019)	Weipining	Huangqi，Hedysarum Multijugum Maxim.，Taizishen，Pseudostellariae Radix Baizhu，Atractylodes Macrocephala Koidz.，Fuling，Poria Cocos(Schw.) Wolf.，Sanqi，Panax Notoginseng (Burk.) F. H. Chen Ex C. Chow，Baihuasheshecao，Hedyotis Diffusae Herba	GPL animal model (Atp4a-/- mice)		HKII,PKM2,ENO1,MPCI,LDHA,P13K,p—AKT, mTOR,HIF-1α,AMPK,Rheb,NF—κB ↑SIRT6,TSCl,TSC2	simulate the model of precancerous 1esions of gastric cancer	mTOR／HIF一1Q／SIRT6
IM/Dys-GC
Huang et al (2016)	Wang' s lianpo decoction	Houpu，Magnolia Officinalis Rehd Et Wils．，Huanglian，Coptidis Rhizoma Shichangpu，Acoritataninowii Rhizoma，Banxia，Arum Ternatum Thunb. Dandouchi，Sojae Semen Praeparatum，Zhizi，Gardeniae Fructus Lugen，Phragmitis Rhizoma	CAG rats model was established by sodium deoxycholate		↓IL-6,NF-κb	Reduce inflammation,Regulate the imbalance between proliferation and apoptosis of gastric mucosal cells	IL-6、NF-κB
Li et al (2017)0	Banxia Xiexin decoction	Banxia，Arum Ternatum Thunb.，Huangqin，Scutellariae Radix，Ganjiang Zingiberis Rhizoma，Renshen，Panax Ginseng C. A. Mey.，Huanglian Coptidis Rhizoma，Dazao，Jujubae Fructus，Gancao，licorice	CAG rats model was established by MNNG		↓NF-κB, STAT3, Bcl-2, C-MYC, p21	inhibit the inflammatory factors and cancer factors	NF-κB/STAT3
Cai et al (2017)	Weipixiao	Taizishen，Pseudostellariae Radix，Huangqi，Hedysarum Multijugum Maxim. Baizhu，Atractylodes Macrocephala Koidz.，Danshen，Radix Salviae，Baihuasheshecao，Hedyotis Diffusae Herba et al.	CAG rats model was established by N-methyl-N'-nitro-N-nitrosoguanidine(MNNG) and dietary irregularity		↓TGF-βRⅡ,p-Smad2,p-Smad3,RhoA,CDX2, N-cad,β-catenin	affect the gastric mucosa epithelial mesenchymal transformation	TGF-β1/Smad
Wei et al (2015)	Yiqi Huayu Jiedu method	Dangshen，Codonopsis Radix，Baihe，Lilii Bulbus，Wuyao，Linderae Radix Xiangyuan，Citri Fructus，Danshen，Radix Salviae，Sanqi Panax Notoginseng (Burk.) F. H. Chen Ex C. Chow，Ezhu，Curcumae Rhizoma Baihuasheshecao，Hedyotis Diffusae Herba	CAG rats model was established by N-methyl-N'-nitro-N-nitrosoguanidine(MNNG), ranitidine dosing and Ammonia		↓EGFR，ERK1/2， p-ERK1/2	reverse gastric mucosal dysplasia	EGFR/MAPK
Chen et al (2020)	Xiaopi granule	Dangshen，Codonopsis Radix，Baihe，Lilii Bulbus，Wuyao，Linderae Radix，Xiangyuan，Citri Fructus，Danshen，Radix Salviae，Sanqi，Panax Notoginseng (Burk.) F. H. Chen Ex C. Chow，Ezhu，Curcumae Rhizoma，Baihuasheshecao，Hedyotis Diffusae Herba	CAG rats model was established by N-methyl-N'-nitro-N-nitrosoguanidine(MNNG), ranitidine dosing and Ammonia		↑PTEN↓PI3K，Akt， PIP3	promote apoptosis of gastric mucosal cells	PI3K/Akt
Bai Y et al (2019)	Banxia Xiexin decoction	Banxia，Arum Ternatum Thunb.，Huangqin，Scutellariae Radix，Ganjiang Zingiberis Rhizoma，Renshen，Panax Ginseng C. A. Mey.，Huanglian Coptidis Rhizoma，Dazao，Jujubae Fructus，Gancao，licorice	CAG rats model was established using the combined active immunization/ethanol /sodium deoxycholate method		↓PCNA,gas,Notch signaling- associated genes	block the CAG from progressing to early gastric cancer	Notch
Kang et al (2020)	weiwei granules	Dangshen，Codonopsis Radix，Huangqi，Hedysarum Multijugum Maxim. Baizhu，Atractylodes Macrocephala Koidz.，Baihuasheshecao Hedyotis Diffusae Herba，Huangjing，Polygonati Rhizoma，Gouqizi Lycii Fructus，Banzhilian，Scutellariae Barbatae Herba，Sanqi Panax Notoginseng (Burk.) F. H. Chen Ex C. Chow，Ezhu，Curcumae Rhizoma Sanleng，Sparganii Rhizoma	patients with precancerous lesions		↓Wnt1,β-catenin,cyclin D1	play an important role in delaying and reducing the risk of gastric cancer	Wnt/β-catenin
GC
Yuan et al (2021)	Qifangweitong granule	Huangqi，Hedysarum Multijugum Maxim.，Baizhu，Atractylodes Macrocephala Koidz.，Fuling，Poria Cocos(Schw.) Wolf.，Gancao，licorice，Renshen，Panax Ginseng C. A. Mey.，Baishao，Paeoniae Radix Alba，Zhishi，Aurantii Fructus Immaturus，Muxiang，Aucklandiae Radix，Huanglian，Coptidis Rhizoma，Wuzhuyu，Evodiae Fructus，Danshen，Radix Salviae		human gastric adenocarcinoma cell AGS	↑E-cadherin↓N-cadherin, Smad2,pSmad2/3	inhibit the EMT process of human gastric adenocarcinoma AGS cells	TGF-β1/Smad
